# Supplementary material for: Mechanisms of hyperexcitability in Alzheimer’s disease hiPSC-derived neurons and cerebral organoids vs isogenic controls
Source: eLife. 2019 Nov 29;8:e50333. doi: 10.7554/eLife.50333 (PMC6905854; doi:10.7554/eLife.50333)
Supplement: Figure 1—source data 1. [file elife-50333-fig1-data1.xlsx]

## Sheet: Sheet1
Figure 1
Figure 1B				Figure 1D					Figure 1E				Figure 1F				Figure 1G				Figure 1H				Figure 1I
WT/WT	M146V/WT	APPswe/WT		WT/WT	M146V/WT	APP swe/WT			WT/WT	M146V/WT	APP swe/WT		WT/WT	M146V/WT	APP swe/WT		WT/WT	M146V/WT	APP swe/WT		WT/WT	M146V/WT	APP swe/WT		WT/WT	M146V/WT	APP swe/WT
0.05	0.665217	0.128958		-46	-45	-50			-29	-32	-30		63.38	99.97	99.75		14.47	6	8.72		-6.1	-18.902	-12.25		16	8	23
0.048	0.3475	0.17		-36	-32	-48			-30	-35	-30		75.14	109.244	98.2		9.21	3.27	7.88		-10.366	-21.95	-27.57		21	12	25
0.0666667	0.3	0.1		-33	-30	-32			-32	-34	-25		80.366	93.703	83.59		8.45	4.7	5.8		-10.976	-22	-14.63		18	18	28
0.03	0.3837	0.186667		-25	-31	-45			-32	-35	-30		63.71	101.88	87.13		14.42	3.5	7.4		-8.49	-21.484	-14.093		15	16	14
0.02	0.3333	0.34		-32	-25	-30			-34	-38	-28		56	98.16	90.45		6.32	5.26	7.2		-13.415	-19.857	-13.48		20	20	16
0.04	0.24	0.24		-35	-35	-34			-38	-36	-26		96.25	90	74.555		5.68	4.916	8.5		-22.56	-20.508	-24.5		23	22	12
0.07	0.11	0.2		-35	-48	-40			-36	-30	-25		82.12	100.453	89.54		7.12	4.808	7.15		-12.62	-17.112	-14		22	13	8.35
0.08	0.2	0.5		-36	-30	-30			-25	-35	-22		70.93	87.789	86		12.5	5.1	6		-12.805	-23.763	-15.31		28	11.22	20
0.1	0.4	0.19		-35	-28	-20			-25	-30	-28		61.68	107.24	67		14.12	8.68	5.2		-9.1	-13.763	-14.1		20	15	14
0.06	0.46	0.22		-30	-25	-26			-22	-33	-25		66.56	89	100		10.29	6.79	3.8		-7.3	-21.159	-20.18		18	26	24
0.076	0.25	0.18		-28	-30	-25			-33	-32	-33		72.91	103.944	108		15.23	4.77	4.2		-13.95	-22.135	-22		20	20	20
0.08	0.19	0.187		-32	-28	-21			-25	-34	-25		75.23	104.158	83		12.37	4	3		-11.52	-14.97	-17.97		15	24	18
0.02	0.17	0.21		-45	-42	-36			-28	-31	-27		84.37	96.8	98.7		15	6	5		-10.12	-13.48	-10.48		30	15	22
				-30	-38	-40			-27	-20	-35		82.66	99.95	76		12.1	9.97	6.9		-7.9	-18.29	-17.29		34	11.79	16
				-37	-35	-34			-28	-22	-31		50	105	89		11.52	4.65	7.2		-6.7	-9.86	-25.2		35	27	16
				-27	-52	-32			-30	-25	-20		80.68	106.51	102.6		12.86	7.9			-8.7	-26.22	-28.3		25	20	22
				-60	-30	-48			-30	-28	-29		79.8	80.59	100.1			6.85			-10.1	-30.63	-11.6		32	29	15
				-37	-43	-55			-35	-29	-30		59.7	89.8	101.8										26	10.69	20
				-40	-39	-36							82.1	103.2	95										34	14	15
				-42	-31	-33							80.7	109	90										25	10	21
																									33	17	19
																									37	23	20
																									40	5.4	13
																									31	5.31	11
																									26	11.69	9
																									22	18	25
																									30	19	30
																									25	23
																									29	29
																										18
