# Supplementary material for: Mechanisms of hyperexcitability in Alzheimer’s disease hiPSC-derived neurons and cerebral organoids vs isogenic controls
Source: eLife. 2019 Nov 29;8:e50333. doi: 10.7554/eLife.50333 (PMC6905854; doi:10.7554/eLife.50333)
Supplement: Figure 2—source data 1. [file elife-50333-fig2-data1.xlsx]

## Sheet: Sheet1
Figure 2
Figure 2E				Figure 2F				Figure 2H								Figure 2I
WT/WT	M146V/WT	APPswe/WT		WT/WT	M146V/WT	APPswe/WT		WT/WT	M146V/WT	APP swe/WT	WT/WT	M146V/WT	APP swe/WT			WT/WT t rise	M146V/WT t rise	APP swe/WT	WT/WT t decay	M146V/WTt decay	APP swe/WT
1542.9	381	490		8	5	3		81.6462	108.154	99.9565	43.12	74.2319	75.9217			1.31	1.6	1.2	3.11	3.2	2.95
1028	322	212		5	5	3		84.3688	114.588	72	31.28	75.4403	83			1.63	1.54	0.84	3.8	3.05	3.2
1645	467	216		7	2	3		119.1	135	130.14	37.2222	114.682	32.4071			2.14	1.6	0.94	4.67	2.47	2.32
847	415	581		6	2	2		109.967	142.1	122	33.1	53.1833	36.1429			0.68	2.23	1.07	4.76	2.35	3.89
1018	2079	372		7	2	3		100	129.1	109.132	26.1255	64.27	61.375			1.19	0.74	1.88	4.12	3.51	1.6
661	925	2372		8	3	4		107.409	50.4348	81.2	29.1639	54.5	73.9167			1.05	0.82	1.28	3.7	3.44	0.87
2438	1231	1879		9	4	2		55	108	56.3333	20.9909	141.462	44.3333			0.61	1.22	1.05	4.29	2.15	2.07
1470	696	879		15	5	3		78.9565	104.467	63.4	49.132	56.5217	59.6			1.55	1.67	1.63	3.75	3.22	1.49
5110	705.89	614.765		12	10	7		93.9091	102.128	117.571	45.3	46.6667	60.8571			0.68	2.23	1.07	5.76	2.35	3.89
3872	300	901.35		10	4	5		103.228	120	99.8	18.1818	38.2979	26.6667			2	1.74	1.98	3.12	3.61	1.92
1108	336.899	863.377		29	2	2		152.133	96.6667	75.48	38.2979	66.6667	35			1.25	1.82	1.08	2.7	2.04	1.87
1896.66	252	508.489		17	4	1		136.1	54.5455	120	41.6667	50	28.7778			0.61	1.02	0.98	4.29	2.02	0.97
2001	585	1370		9	7	7		125.714	55	72.1111	21.4286	51.8182	41.6667			1.6	1.87	1.69	3.9	3.52	1.82
2894.11	364.76	711.907		12	4	9		22.3333	196.667	113.273	17.8571	25.115	38.6			1.8	1.97	1.25	4.67	2.01	2.89
1865.73	503.211	1026.53		11	1	2		121.588	151.515	108	13.3333	50.4556	52			2.03	1.04	2.16	3.82	3.49	3.8
2166	2248	537.34		9	1	1		108	51.7241	80	13.2353	121.212	102
5152	336	1012		15	3	6		110	109.1	103	81	44.4828	75
4100	212.77	300		12	3	2					81.8182	91.8182	186.667
3019	1182.34	201		13	6	9					30	150	150
4681	933	890		8	2	2					107.143	138.889	136
4440.15	1011	2110		10	2	5					47	200
3008	708	1108		4	7	5						150
2891	405	567		15	2	2
3230	867	887		17	9	11
5612	2109	3210		15	3	2
2008	1003	989
689	459	346
700	900	893
902	900	1006
589	300	789
