# Supplementary material for: Mechanisms of hyperexcitability in Alzheimer’s disease hiPSC-derived neurons and cerebral organoids vs isogenic controls
Source: eLife. 2019 Nov 29;8:e50333. doi: 10.7554/eLife.50333 (PMC6905854; doi:10.7554/eLife.50333)
Supplement: Figure 3—source data 1. [file elife-50333-fig3-data1.xlsx]

## Sheet: Sheet1
Figure 3
Figure 3D_2 weeks							Figure 3D_4 weeks								Figure 3D_6 weeks
WT/WT	M146V/WT	APPswe/WT	WT/WT	M146V/WT	APPswe/WT		WT/WT	M146V/WT	APPswe/WT	WT/WT	M146V/WT	APPswe/WT			WT/WT	M146V/WT	APPswe/WT	WT/WT	M146V/WT	APPswe/WT
29.5833	211.528	110.071	33.3333	105.764	18.3571		66.6667	102.385	69.9565	33.3333	84.6154	75.9217			93.9091	102.128	99.8	18.1818	38.2979	56.6667
72.4	115.098	118.05	30	40.6229	47.7		44.95	50	72	8.15	30	73			103.228	120	78.48	38.2979	66.6667	34
59.8824	59.4286	80.9333	23.5294	35.7143	25		89.6	50	31.5429	38.6	29.1667	22.4071			152.083	96.6667	120	41.6667	50	78.7778
53.8462	68.4615	62.25	23.0769	35.4359	24.4375		46.6667	66.6667	54.4286	20	40	36.1429			136.071	54.5455	83.3333	21.4286	81.8182	41.6667
58.5714	70.9091	57.1429	9.52381	31.8182	28.5714		29.4118	105.714	75	6.17647	107.143	41.375			125.714	55	54.7	17.8571	35.115	38.6
40	112	45.8824	22	52	23.5294		34.2857	85.96	82.3333	12.8571	60	63.9167			22.3333	216.667	72.1111	13.3333	50.4556	42
		84.8828			32.3363		75	113.333	58.3333	25	73.3333	44.3333			121.588	151.515	143.273	13.2353	121.212	92
							58.0645	60	63.4	19.3548	50	49.6				51.7241			44.4828
							56.9583	66.6667	117.571	15.7083	33.3333	60.8571				109.091			91.8182
							63.16	48		16	36
								68.1818			45.4545
								100			142.857
								106.667			133.333
								62.069			44.8276
Figure 3E_2 weeks					Figure 3E_4 weeks					Figure 3E_6 weeks
WT/WT	M146V/WT	APPswe/WT			WT/WT	M146V/WT	APPswe/WT			WT/WT	M146V/WT	APPswe/WT
12	18.91	14			18	26	23			22	21	15
10	14.77	20			20	20	25			47	23	25
17	35	15			15	24	28			12	22	18
13	39	16			30	25	14			14	20	24
21	22	14			34	28	16			24	18	20
20	25	17			35	25	12			15	13	18
		12.37			20	15	18			17	29	22
					31	23	20			27	10	20
					24	10	14			37	22	23.76
					25	25	12			40	26	7.29
					37	18				35	16.92	26.5
					29	24				32	20.97	25.3
					40	17				39	19.07
						19				36
										41
