# Supplementary material for: Mechanisms of hyperexcitability in Alzheimer’s disease hiPSC-derived neurons and cerebral organoids vs isogenic controls
Source: eLife. 2019 Nov 29;8:e50333. doi: 10.7554/eLife.50333 (PMC6905854; doi:10.7554/eLife.50333)
Supplement: Figure 4—source data 1. [file elife-50333-fig4-data1.xlsx]

## Sheet: Sheet1
Figure 4
Figure 4B					Figure 4C
WT/WT	M146V/WT	APPswe/WT			WT/WT	M146V/WT	APPswe/WT
2.978	5.752	5.632			0.371429	2.1	2.34615
4.588	6.764	4.89			0.161111	2.10417	3.05263
4.358	7.063	4.1			0.385417	2.9875	2.05435
3.96	12.23	5.1			0.1625	2.1125	0.875
3.077	7.23	6.7			0.247917	5.52632	4.69231
4.03	6.8	4.8			0.641667	6.33333	4.94118
4.968	6.22	6.23			0.625	5.71429	5.71429
2.54	11.36	5.573			0.325	5.26923	1.89744
4.191	7.6	7.2			1.26549	1.3	1.2
5.35	10.953	12.235			0.411	3.469	1.2
6.221	12.12	10.481			0.806	2.361	2.624
7.21	9.097	13.7819			0.656	2.558	2.143
