# Supplementary material for: Mechanisms of hyperexcitability in Alzheimer’s disease hiPSC-derived neurons and cerebral organoids vs isogenic controls
Source: eLife. 2019 Nov 29;8:e50333. doi: 10.7554/eLife.50333 (PMC6905854; doi:10.7554/eLife.50333)
Supplement: Figure 6—source data 1. [file elife-50333-fig6-data1.xlsx]

## Sheet: Sheet1
Figure 6
Figure 6B_WT/WT						Figure 6B_M146V/WT				Figure 6B_APPswe/WT
WT/WT	WT/WT+GSi	WT/WT+BACEi				M146V/WT	M146V/WT+GSi			APPswe/WT	APPswe/WT+BACEi
0.01	0.3	0.1				0.9	0.16			1.25	0.333333
0.022222	0.07	0.15				0.525	0.09375			1	0.3
0.1	0.09	0.056667				0.65	0.03			0.4	0.1
0.173333	0.07	0.033333				0.24	0.026667			0.72	0.083333
0.15	0.126	0.05				0.123	0.033333			0.416667	0.04
		0.116667				1.12	0.008333			0.3	0.3
		0.058333				0.23	0.014286			0.078	0.01
						0.3	0.33636			0.36	0.1
							0.121			0.4	0.03
											0.075
											0.126667
Figure 6D_WT/WT						Figure 6D_M146V/WT				Figure 6D_APPswe/WT
WT/WT	WT/WT+GSi	WT/WT+BACEi				M146V/WT	M146V/WT+GSi			APPswe/WT	APPswe/WT+BACEi
27.7778	100	23.2558				214.286	46.9504			73.3333	85.0189
31.25	83.3333	66.0377				196.429	68.1818			150	82.15
50	29.0323	75				105.263	22.7273			100	15.3846
66.6667	10.5263	138.889				175	27.7971			120	44.4444
11.1111	32	64.5161				100	139.391			76.9231	56.7261
80	32	44.9516				133.333	33.0442			205.882	32.9218
100.03	57.1429	21.5385				150	40.8998			166.667	21.2314
74.56	139.482	151.751				140	16.6667			130.435	11.1111
87.98	110.12	117.129				147.059	27.7932			105.263	76.2527
99.09	136.388	15.3846				109.141	5.55556			185	33.1345
52.6316	29.2018	44.4444				120.21	19.6292			201.804	68.109
97.2222	166.667					74.9064	2.67953			196.296	62.5
						110.21	9.8401			128	42.4899
							25.0125				5.30082
							7.50188				37.0142
							35.791				2.12766
							6.17665				109.13
							64.3799
							68.9394
							71
