# Supplementary material for: Mechanisms of hyperexcitability in Alzheimer’s disease hiPSC-derived neurons and cerebral organoids vs isogenic controls
Source: eLife. 2019 Nov 29;8:e50333. doi: 10.7554/eLife.50333 (PMC6905854; doi:10.7554/eLife.50333)
Supplement: Figure 7—source data 1. [file elife-50333-fig7-data1.xlsx]

## Sheet: Sheet1
Figure 7
Figure 7F
WT/WT	M146V/WT	APPswe/WT			Figure 7H
179	55	278			WT/WT	M146V/WT	APPswe/WT
476	89	60			0.00946	0.098	0.1129
338	23.34	108			0.667	1.519	1.89
135	109	102			0.0155	0.1543	0.0621
323	23.8	107.93			0.0103	0.466	0.0876
421	79.8	156			0.00962	0.1282	0.2885
516	83	231			0.0066	0.176	0.0852
347.56	28	167			0.012	0.088	0.356979
198	102	195			0.001146	0.290938	1.98
415	89.9	323.4			0.87	1.23	1.26
196.73	44.7	67.8			0.09	0.99	0.52
278.9	102.8	89.6			0.0078	1.69	1.25
400.9	56.7	173.7			0.52	1.23	0.95
202.8	132.8	213.8			0.045	0.82	1.32
417.9	109.7	177
301	104	113
365.7	145.6	102
99.6	63	192.8
384.78	21	89.9
102	77	68.3
